# Supplementary material for: Not Reinventing the Wheel: Adapting Treatment Foster Care Oregon to Public Mental Health
Source: Atypon-hosted journal article supplement (doi:10.1176/appi.ps.201900611), 2020-11-10
Supplement: appi.ps.201900611.ds001.pdf [file appi.ps.201900611.ds001.pdf]

**TABLE 1. Adaptations to TFCO Model for Implementation in Public Mental Health System**

| <b>Adaptation Needed</b>                                                                                                                                | <b>Method/<br/>Key Staff Involved</b>                                                                                                       | <b>Deliverable</b>                                                                                                                                       |
|---------------------------------------------------------------------------------------------------------------------------------------------------------|---------------------------------------------------------------------------------------------------------------------------------------------|----------------------------------------------------------------------------------------------------------------------------------------------------------|
| <b>Designating TFCO as a mental health service separate from Child Welfare foster care services</b>                                                     | MDHHS Division of Mental Health Services to Children and Families                                                                           | Crosswalk document detailing state-level differences between Children’s Therapeutic Foster Care Medicaid service and Child Welfare Treatment Foster Care |
| <b>Establishing the concept of a Mental Health Home in Michigan, separate and distinct from traditional foster care homes</b>                           | Shifting language and designation for TFCO treatment homes within Department of Child Welfare Licensing (DCWL) license process and protocol | Establishment of TFCO treatment parents in Michigan as Community Mental Health contracted staff, referred to as “Therapeutic Parents” in Michigan        |
| <b>Adapting TFCO model language to Michigan Medicaid service language</b>                                                                               | Orientation and learning for TFC clinical consultants, cross training between model and Medicaid service                                    | Glossary of Terms                                                                                                                                        |
| <b>Blended credentialing for Therapeutic Parents as state-licensed homes and contracted mental health providers at Community Mental Health agencies</b> | Key stakeholder collaboration within MDHHS Division of Mental Health Services to Children and Families and the Child Welfare division       | Blended credentialing for Therapeutic Parents as state-licensed homes and contracted mental health providers at Community Mental Health agencies         |
| <b>Meeting Department of</b>                                                                                                                            | Stakeholders within MDHHS Child Welfare                                                                                                     | Ongoing consultation                                                                                                                                     |

|                                                                                                                                               |                                                                                                                     |                                                                                                                                                                                                                                                                                                                                                                                                                                                                     |
|-----------------------------------------------------------------------------------------------------------------------------------------------|---------------------------------------------------------------------------------------------------------------------|---------------------------------------------------------------------------------------------------------------------------------------------------------------------------------------------------------------------------------------------------------------------------------------------------------------------------------------------------------------------------------------------------------------------------------------------------------------------|
| <p><b>Child Welfare Licensing requirements: agency staff training, audit and reporting requirements, and communication best practices</b></p> | <p>division engaged to cross training and technical support to clinical sites</p>                                   |                                                                                                                                                                                                                                                                                                                                                                                                                                                                     |
| <p><b>Legal caregiving designation for child while receiving TFCO services</b></p>                                                            | <p>Distinguishing differences between legal guardianship and role of the Therapeutic Parents</p>                    | <p>Consent-for-treatment forms:</p> <ul style="list-style-type: none"> <li>• Establish TFCO as a voluntary Community Mental Health service</li> <li>• Protect legal parental rights of Aftercare Family</li> <li>• Outline responsibilities for Aftercare Family including participation in treatment and facilitating routine medical care</li> <li>• Establish medication administration and emergency medical care parameters for Therapeutic Parents</li> </ul> |
| <p><b>Blended eligibility criteria that met TFCO fidelity standards and CTFC Medicaid billing criteria</b></p>                                | <p>TFCO Leadership team review of Michigan Medicaid Manual requirements and TFCO model eligibility requirements</p> | <p>Medical Necessity document; Screening and Referral document</p>                                                                                                                                                                                                                                                                                                                                                                                                  |
| <p><b>Educational designation allowing for</b></p>                                                                                            | <p>Michigan Department of Education, MDHHS Division of Mental</p>                                                   | <p>Application of the Suitable Housing statute to children</p>                                                                                                                                                                                                                                                                                                                                                                                                      |

**child/youth's enrollment in the Therapeutic Parent's school district that does not require a change in legal custody**

Health Services to Children and Families

and youth in CTFC/TFCO

**Including Wraparound in partnership with TFCO as a requirement for SEDW**

Establish role clarification for intensive care coordination activities and a shared vision for TFCO and Wraparound service plans

Imbedding Wraparound section in TFCO clinical training; technical assistance webinars; TFCO clinical training for Statewide Wraparound Coordinator from MDHHS
